# Supplementary material for: Ru(II) Oxygen Sensors for Co(III) Complexes and Amphotericin B Antifungal Activity Detection by Phosphorescence Optical Respirometry
Source: MDPI journal article supplement (doi:10.3390/ijms24108744), 2023-05-14
Supplement: s1 [file s1]

## Supplementary Materials

# Ru(II) Oxygen Sensors for Co(III) Complexes and Amphotericin B Antifungal Activity Detection by Phosphorescence Optical Respirometry

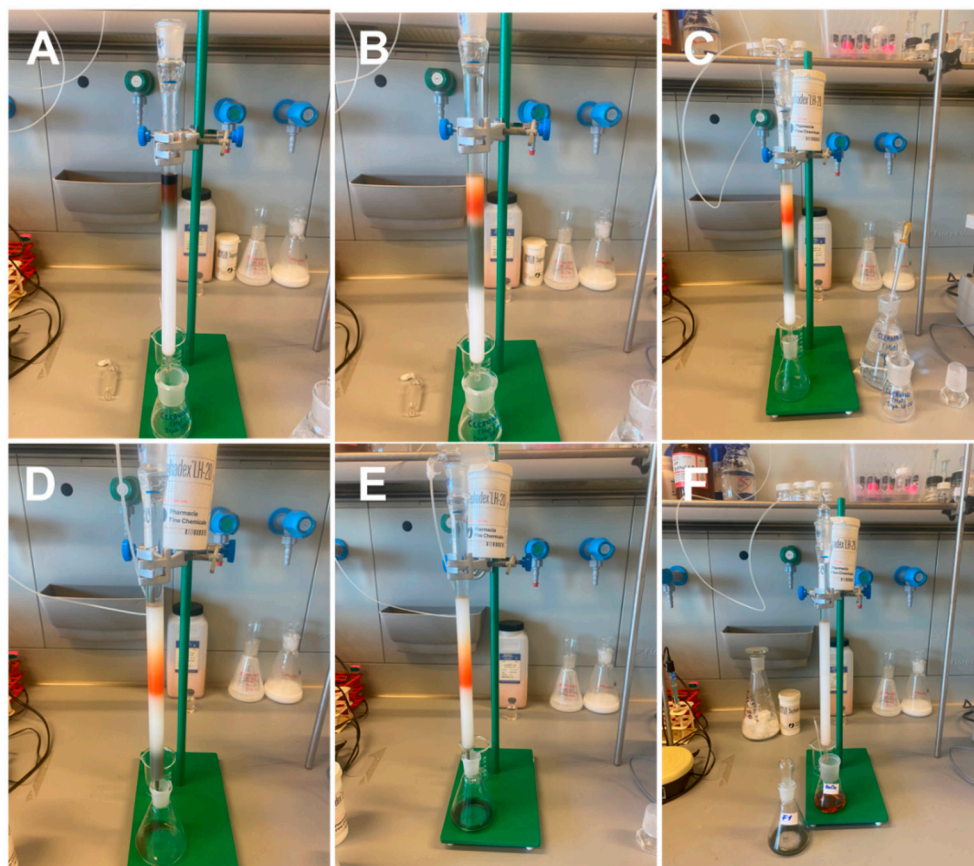

**Figure S1.** The  $\{Ru^{II}[DPP(SO_3Na)_2]_3\}Cl_2$  coordination compound separation process on a column with Sephadex LH-20; the water was used as an eluent; the green isomer reported in the literature as well as the expected BsOx complex product - the oxygen sensor – were obtained.

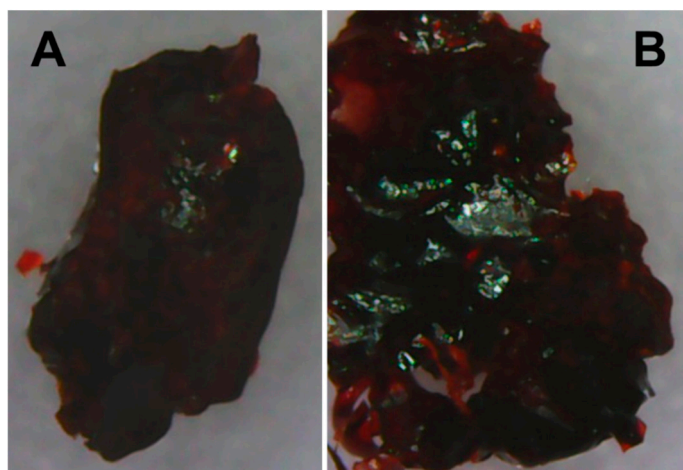

**Figure S2.** The microscopic pictures of the solid state of the oxygen biosensor resynthesized -  $\{Ru[DPP(SO_3Na)_2]_3(10H_2O)Cl_2 \cdot 12H_2O\}$ : **A** and **B** present the different amorphous solid images.

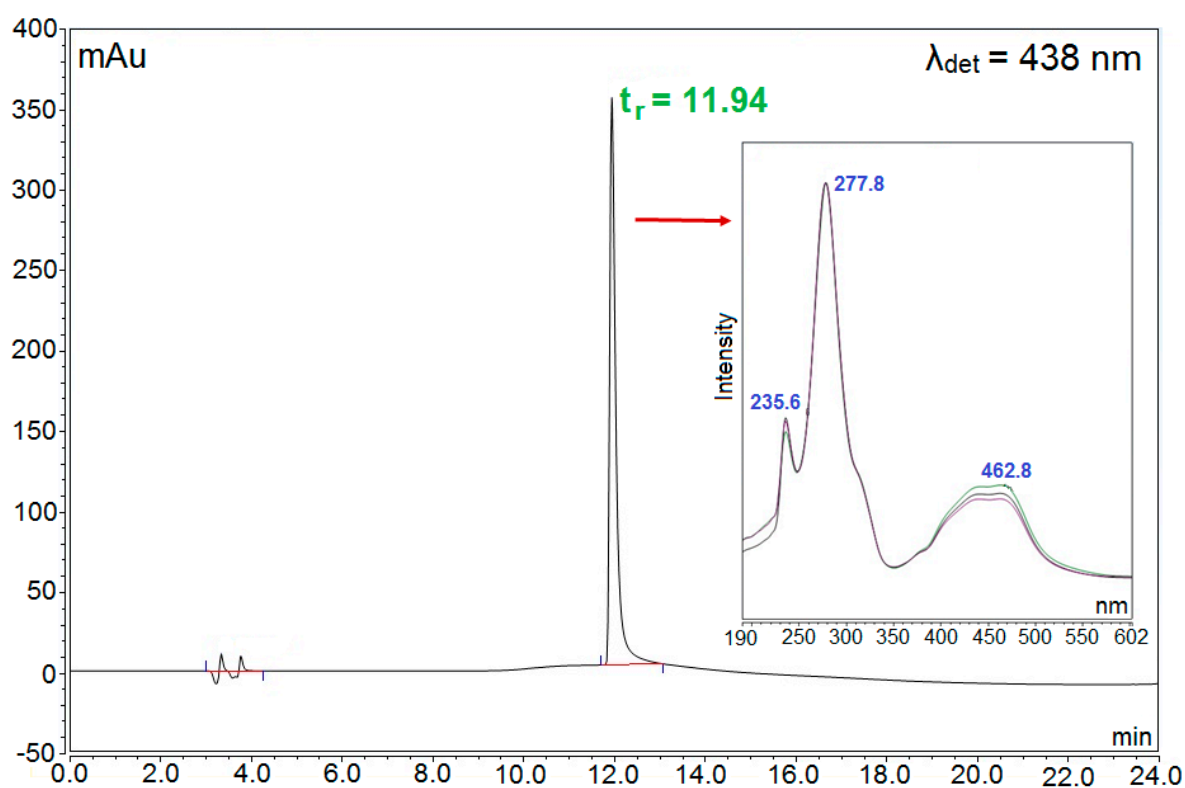

**Figure S3.** UHPLC chromatogram obtained (WVL-438 nm) for BsOx purity identification together with the BsOx UV-Vis spectra registered during this type of analysis.

**Table S1.** The data was obtained from UHPLC analyses.

| Retention time [min] | Peak Area [mAu·min] | Relative Area [%] |
|----------------------|---------------------|-------------------|
| 3.30                 | 0.1622              | 0.28              |
| 11.94                | 56.841              | 99.72             |

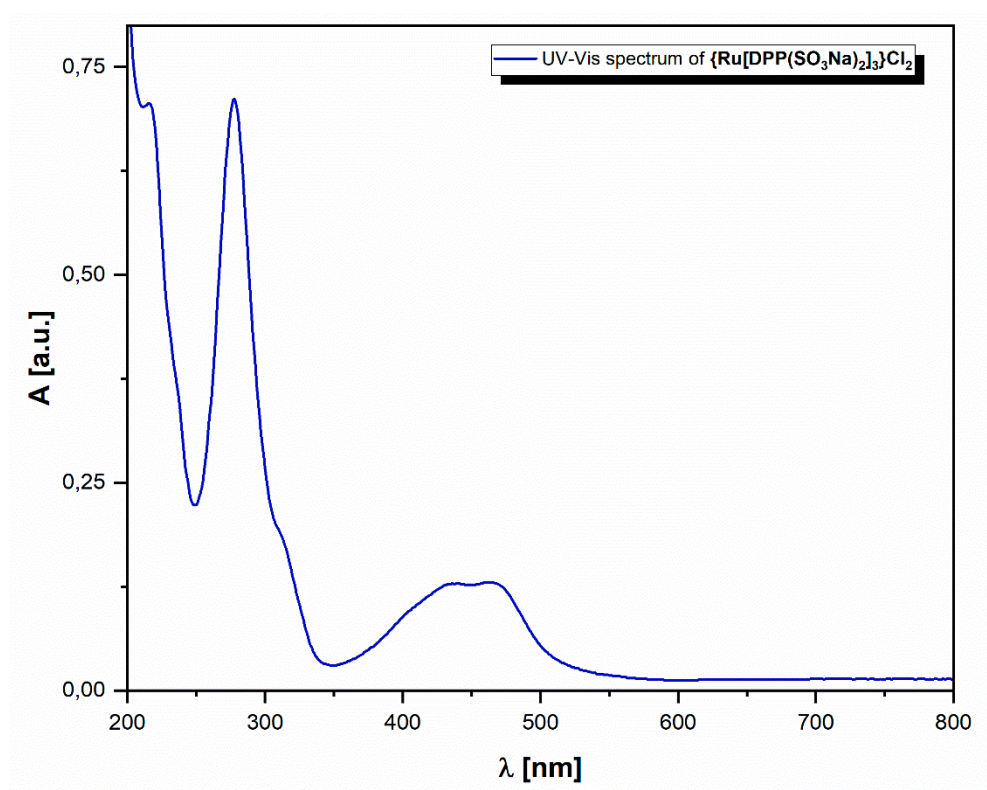

**Figure S4.** The absorption spectrum of an aqueous solution of  $\{Ru^{II}[DPP(SO_3Na)_2]_3\}Cl_2$  studied.

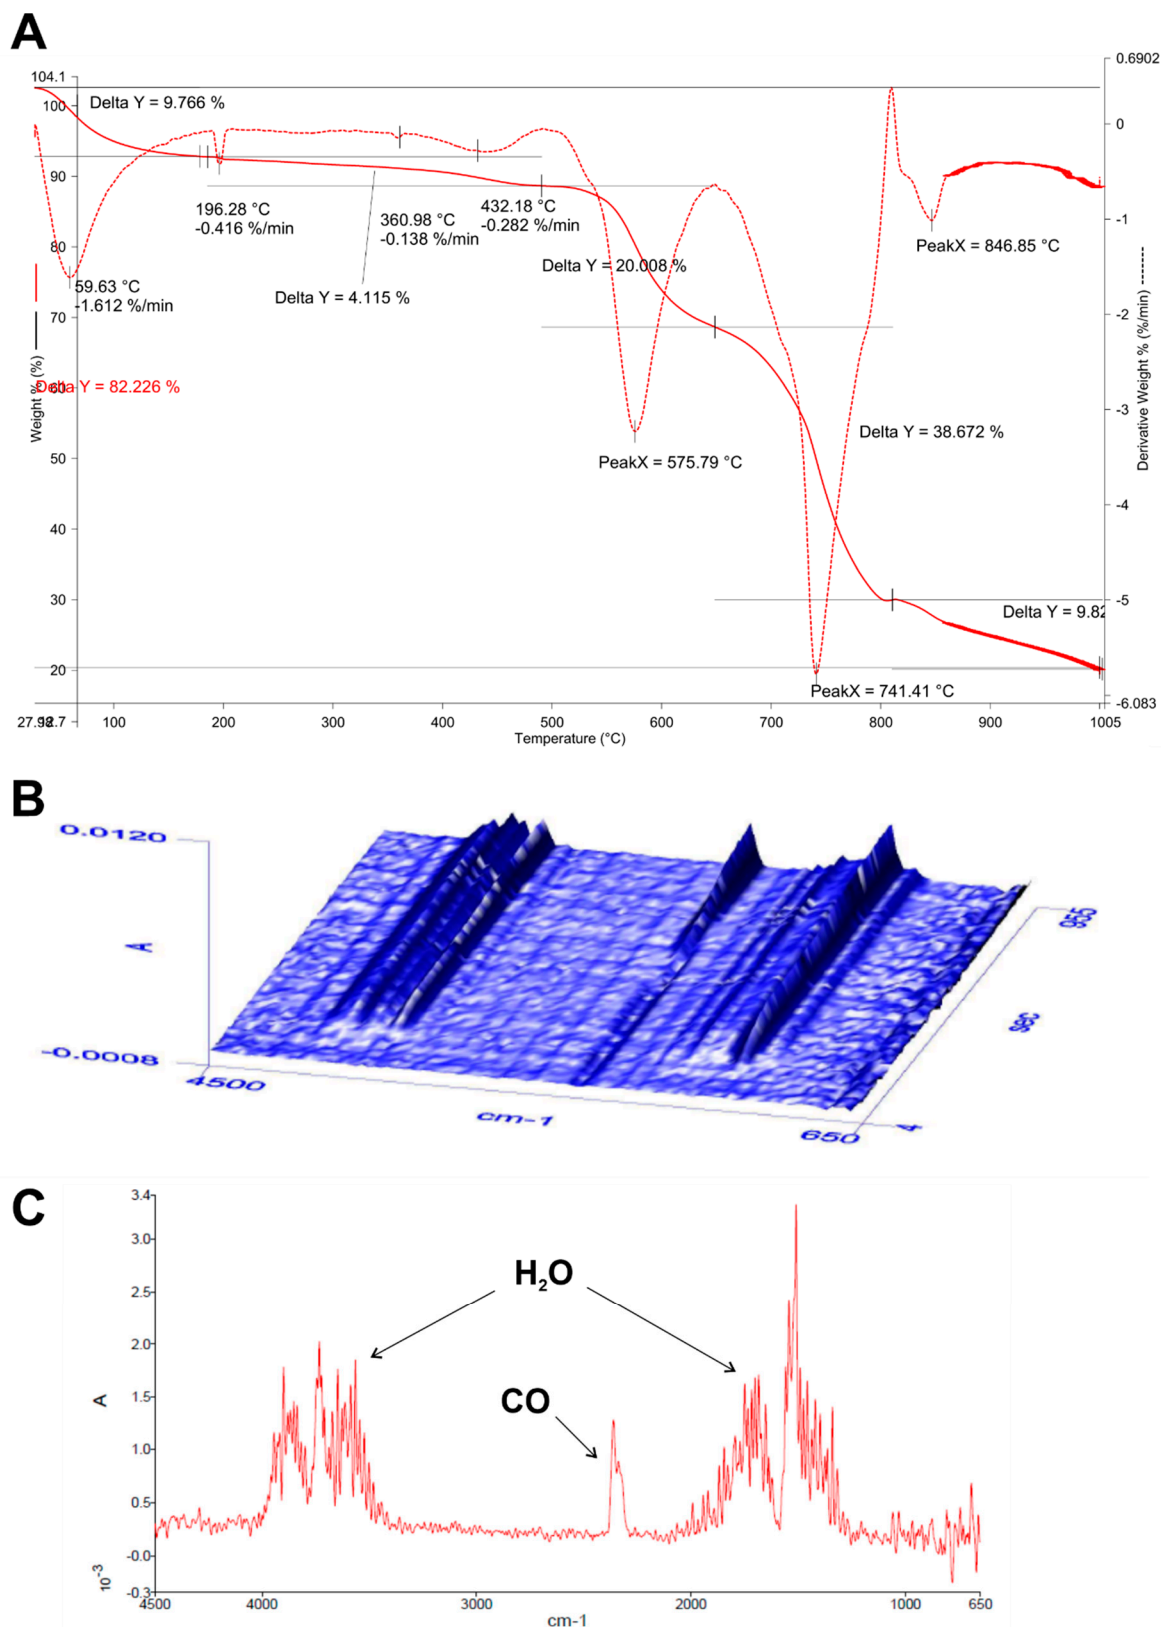

**Figure S5.** The hydration state establishing by using TG/IR measurements: **A.** the subsequent loss of BsOx complex sample weight registered; the first step of decomposition is the evidence of the BsOx hydrate form of solid received; **B.** the presentation of the 3D spatial IR spectra fragment of gaseous products generated by TG measurement; **C.** IR spectra of H<sub>2</sub>O and CO emitted from BsOx complex in 704.56 s of TG/IR analysis; the results presented in **B** and **C** were obtained for 1.607 mg of BsOx sample weight.



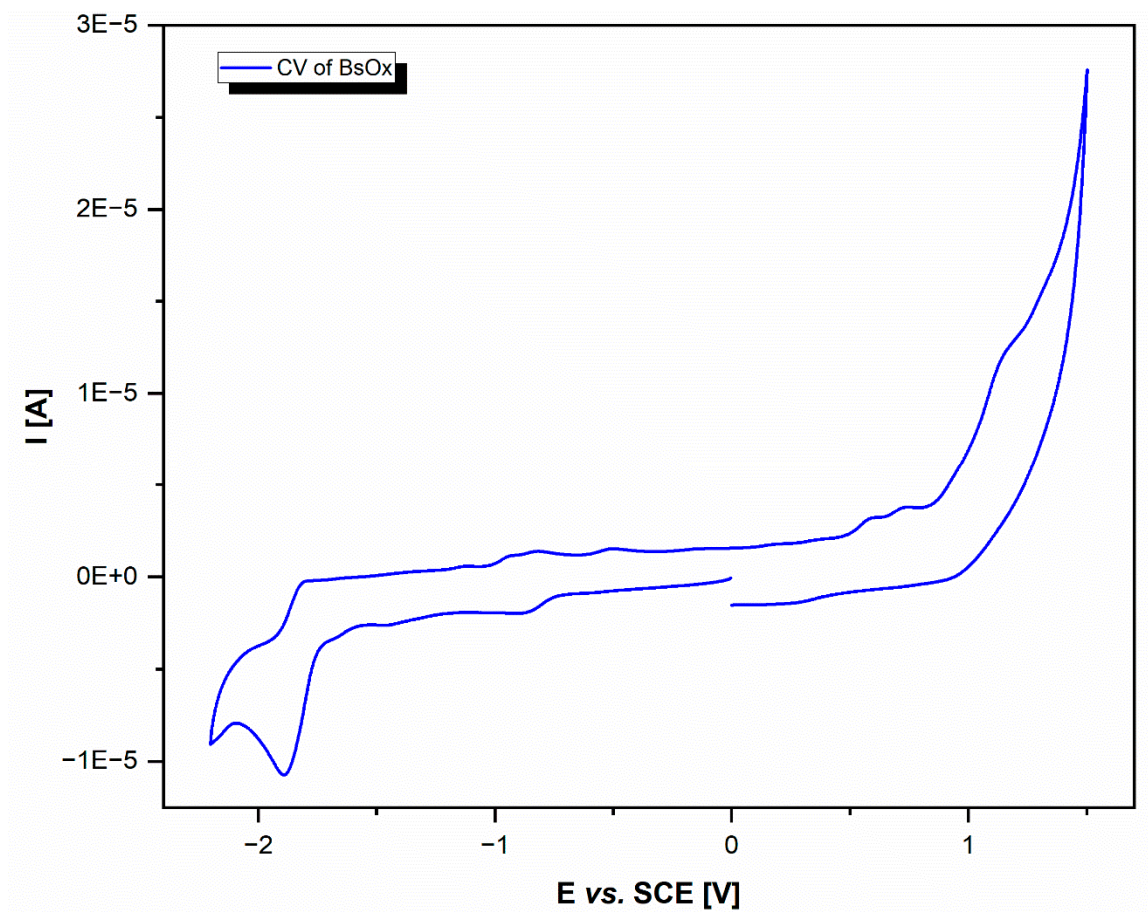

**Figure S6.** Voltamperometric curve of DMSO solution of the BsOx complex ( $10^{-3}$  M with addition of the standard electrolyte for the non-aqueous medium, 0.1 M TBAP) recorded by using glassy carbon working electrode ( $\varnothing = 2$  mm GCE, scan rate: 100 mV/s).

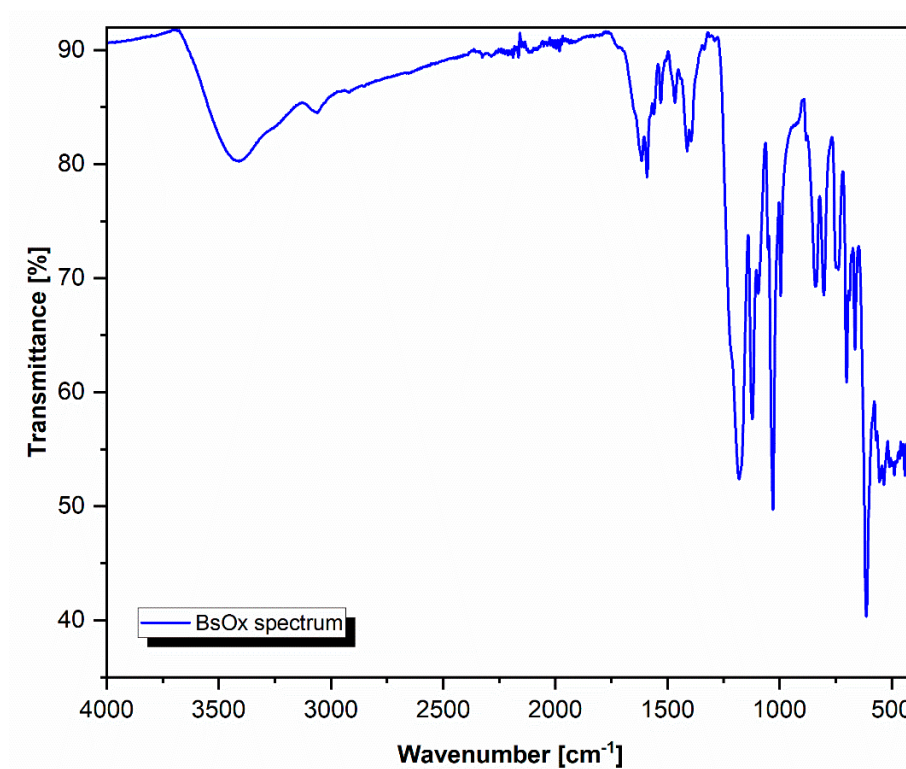

**Figure S7.** ATR spectrum of ruthenium(II) complex synthesized. The BsOx solid sample was used to register the oscillatory vibration bands.

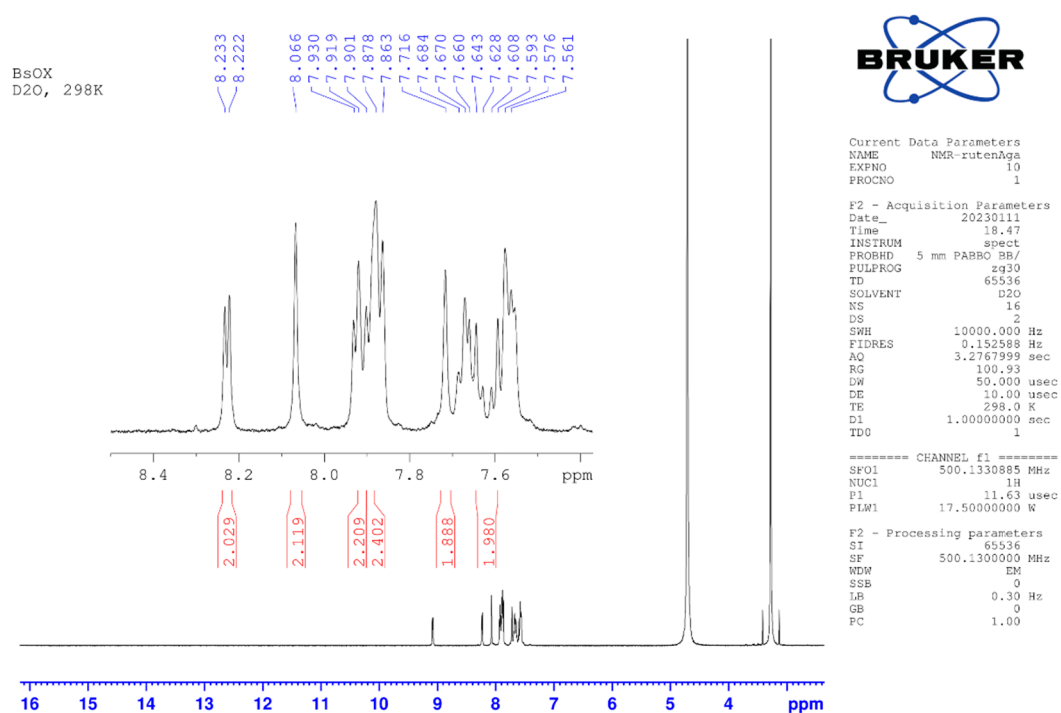

**Figure S8.**  $^1\text{H}$  NMR spectrum of BsOx with proton integration for  $[\text{Ru}[\text{L}]_{1/3}]\text{Cl}_2$  (where L:  $\text{C}_{24}\text{H}_{14}\text{N}_2\text{Na}_2\text{O}_6\text{S}_2 \cdot 3\text{H}_2\text{O}$ ) registered in  $\text{D}_2\text{O}$  at 298K. The complete description was included in the manuscript's main text (see the 2.2. section);

the signals at 4.69 ppm for D<sub>2</sub>O as a solvent; 3.27 ppm for H<sub>2</sub>O hydrate as well as the typical H<sub>2</sub>O signal positions associated with D<sub>2</sub>O.

**A**

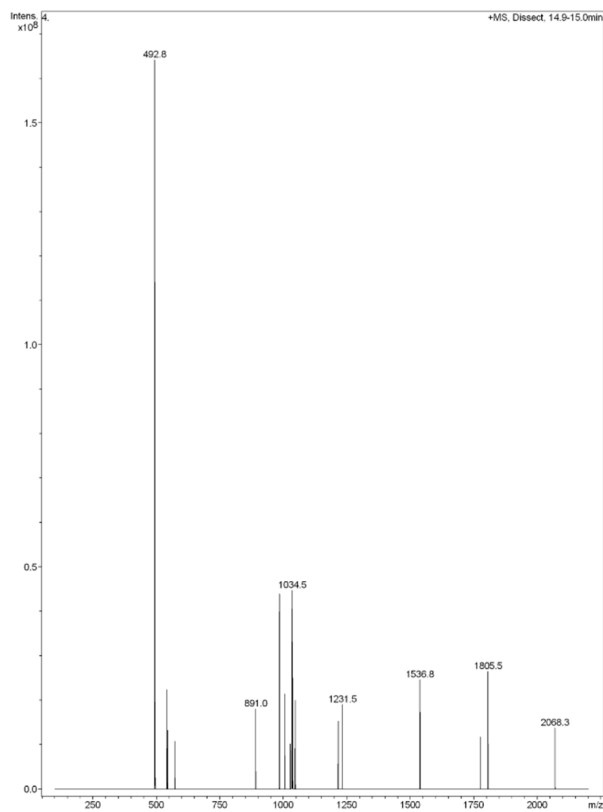

**B**

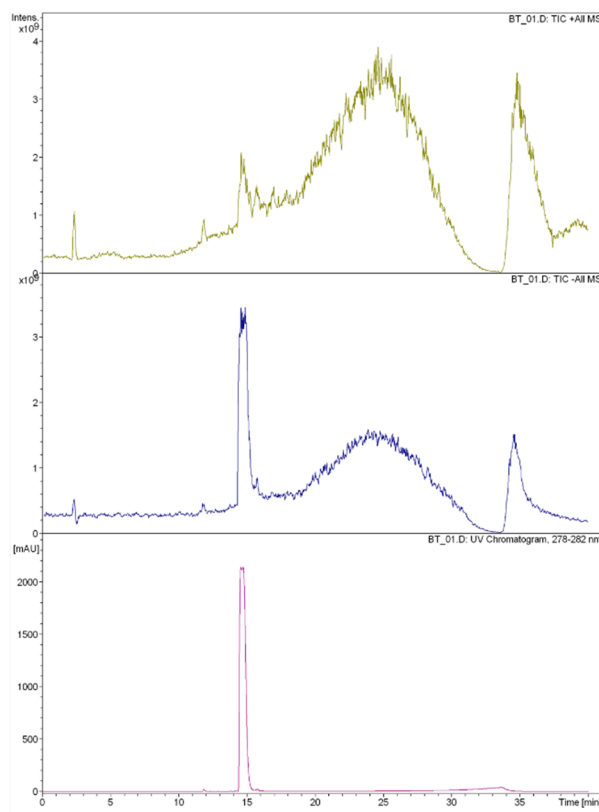

**C**

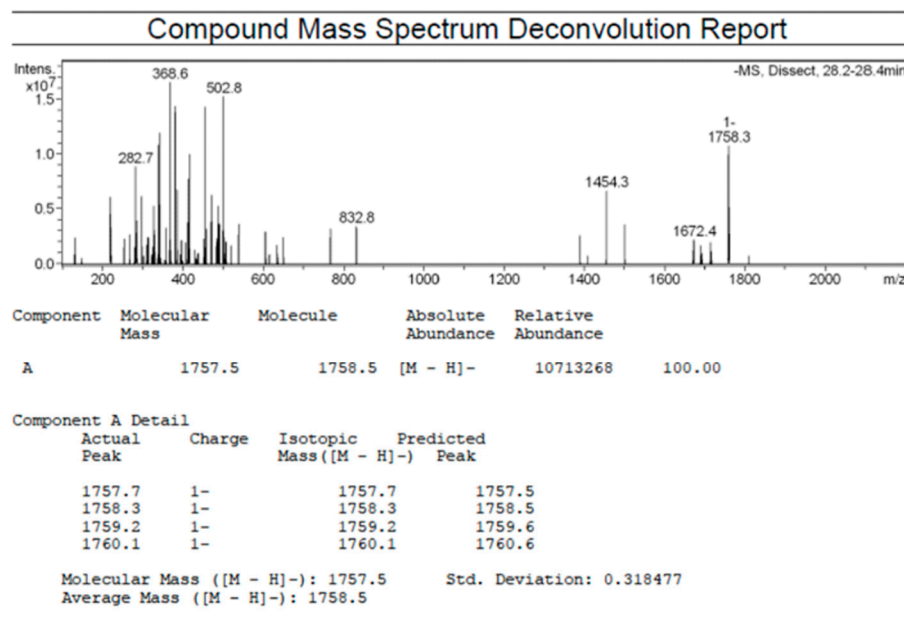

**Figure S9.** The LCMS results for BsOx registered after 15 minutes **A**. The m/z peaks were observed for multiple ionization of the compound. **B**. chromatograms: top – the water background; middle - compound together with the background; bottom – the aqueous solution signal for pure BsOx complex; the background is excluded (15 minutes); **C**. the selected MS negative mode mass spectrum of BsOx included in the deconvolution report for BsOx complex: *found*: 1758.5 [M-Na<sup>+</sup>]; *calc.* 1781.5 [M].

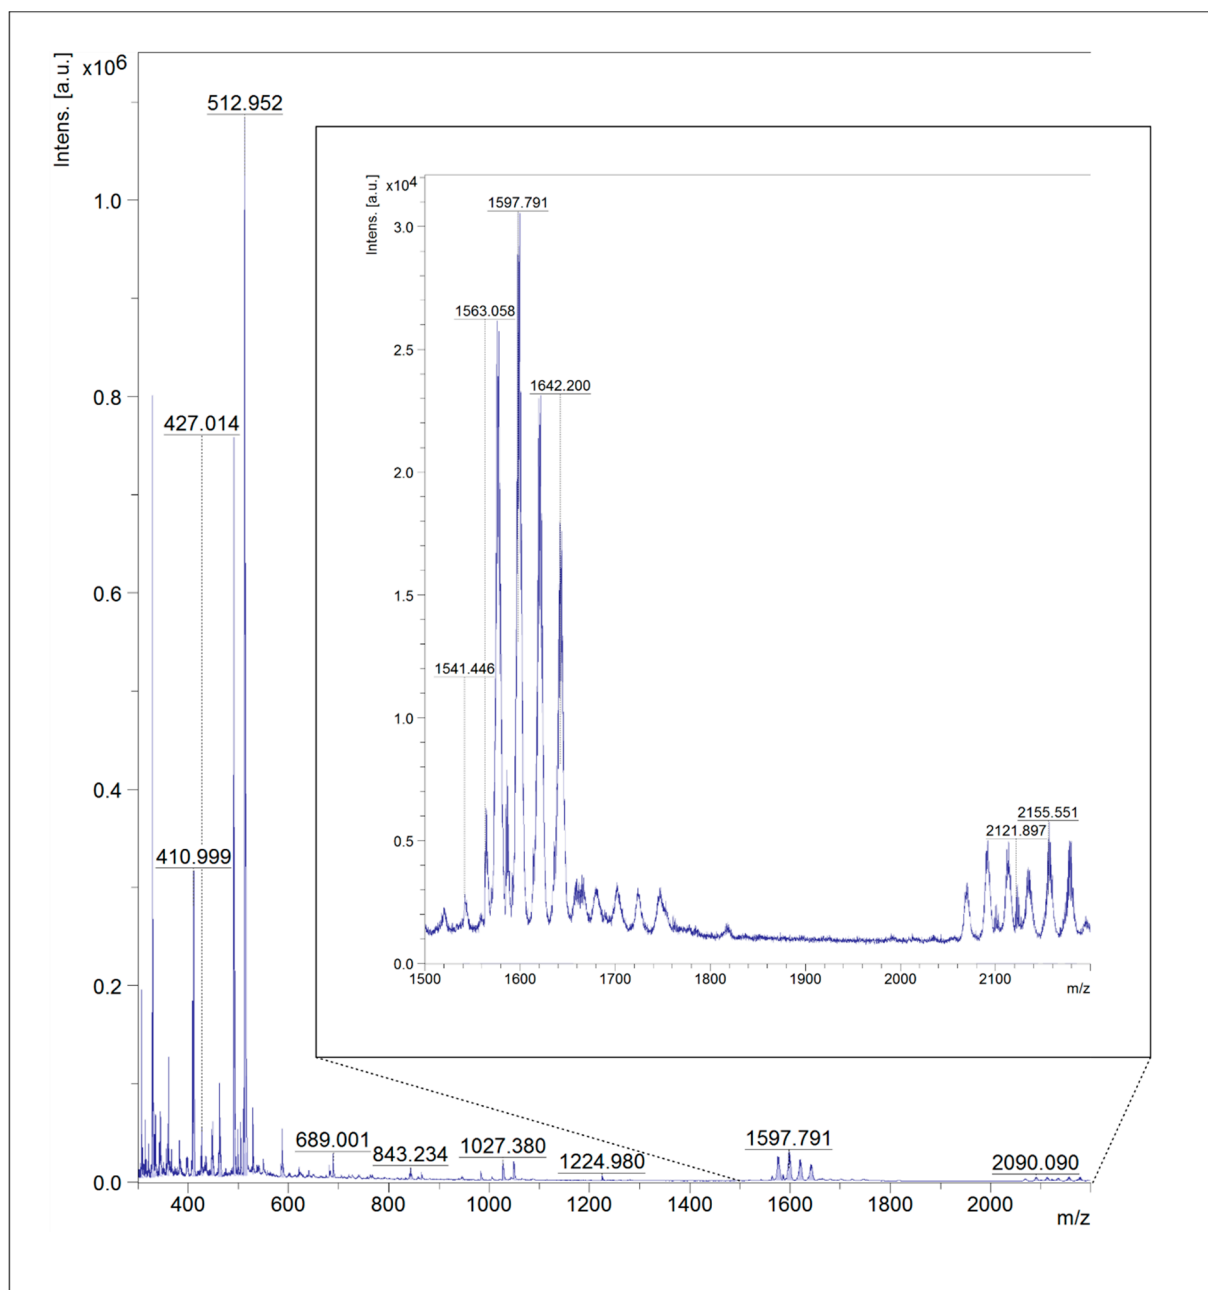

**Figure S10.** MALDI-TOF mass spectrum (DHB matrix) obtained for BsOx probe (multistep ionization process was confirmed by both results of analyses MALDI and QTOF, respectively).



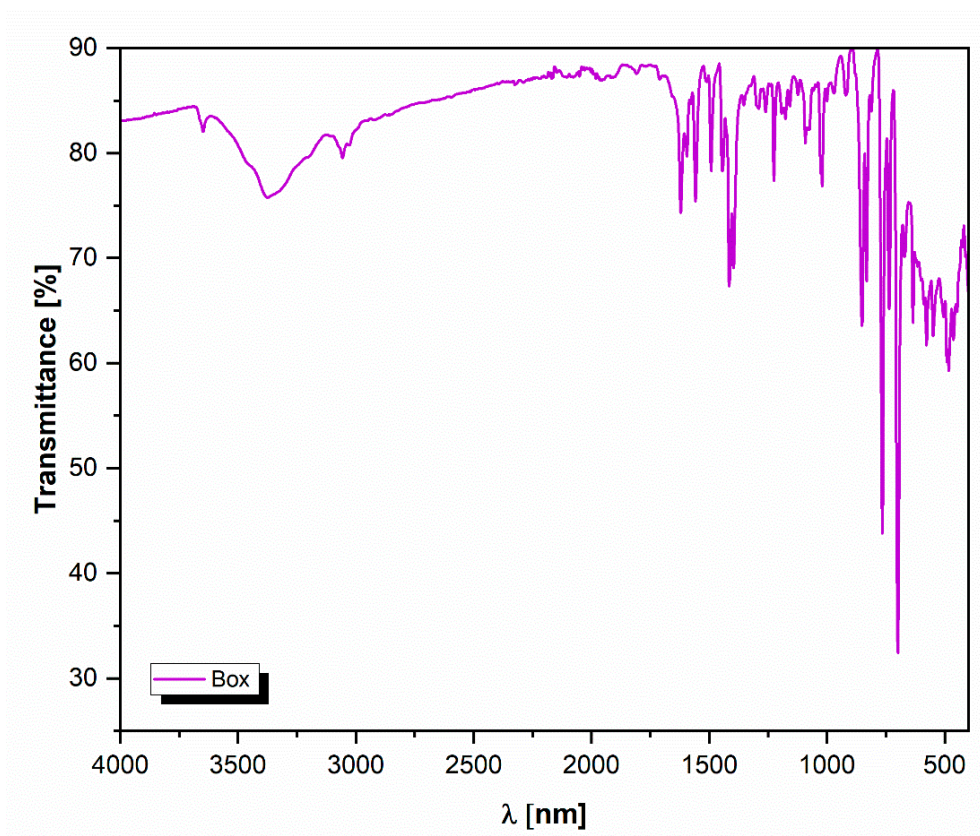

**Figure S11.** ATR spectrum of ruthenium(II) and DPP complex synthesized. The Box solid sample was used to register the oscillatory vibration bands.

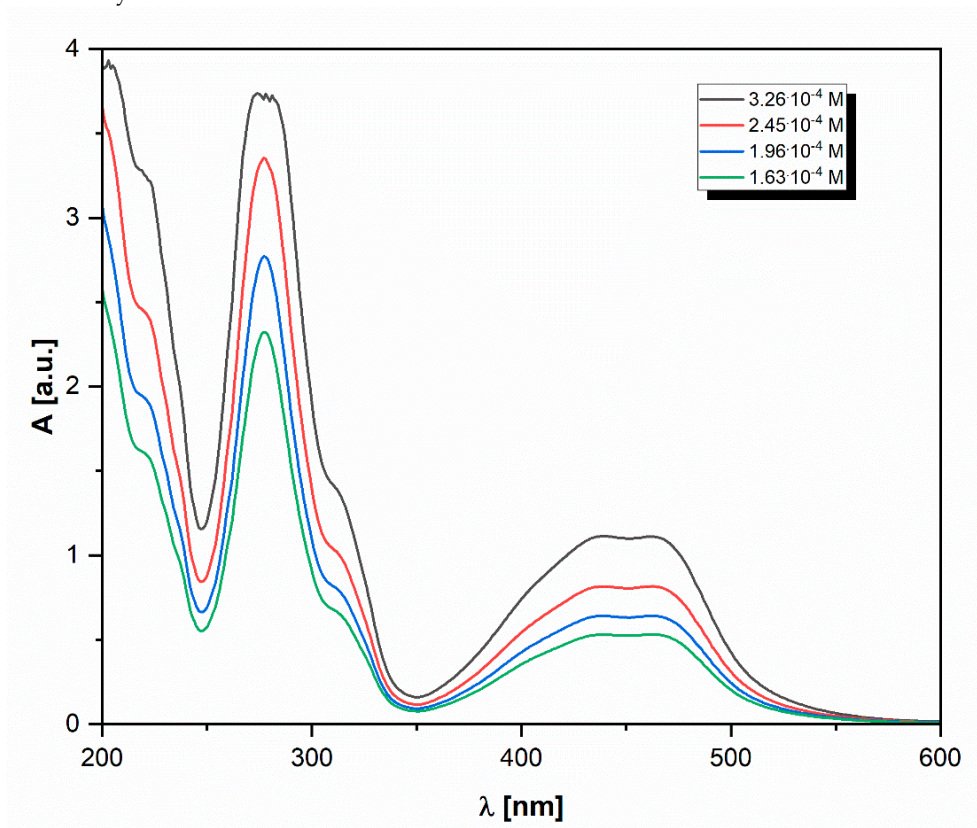

**Figure S12.** The absorption spectra of  $[\text{Ru}^{\text{II}}(\text{DPP})_3]\text{Cl}_2$  studied (Box) aqueous solutions with different concentrations.

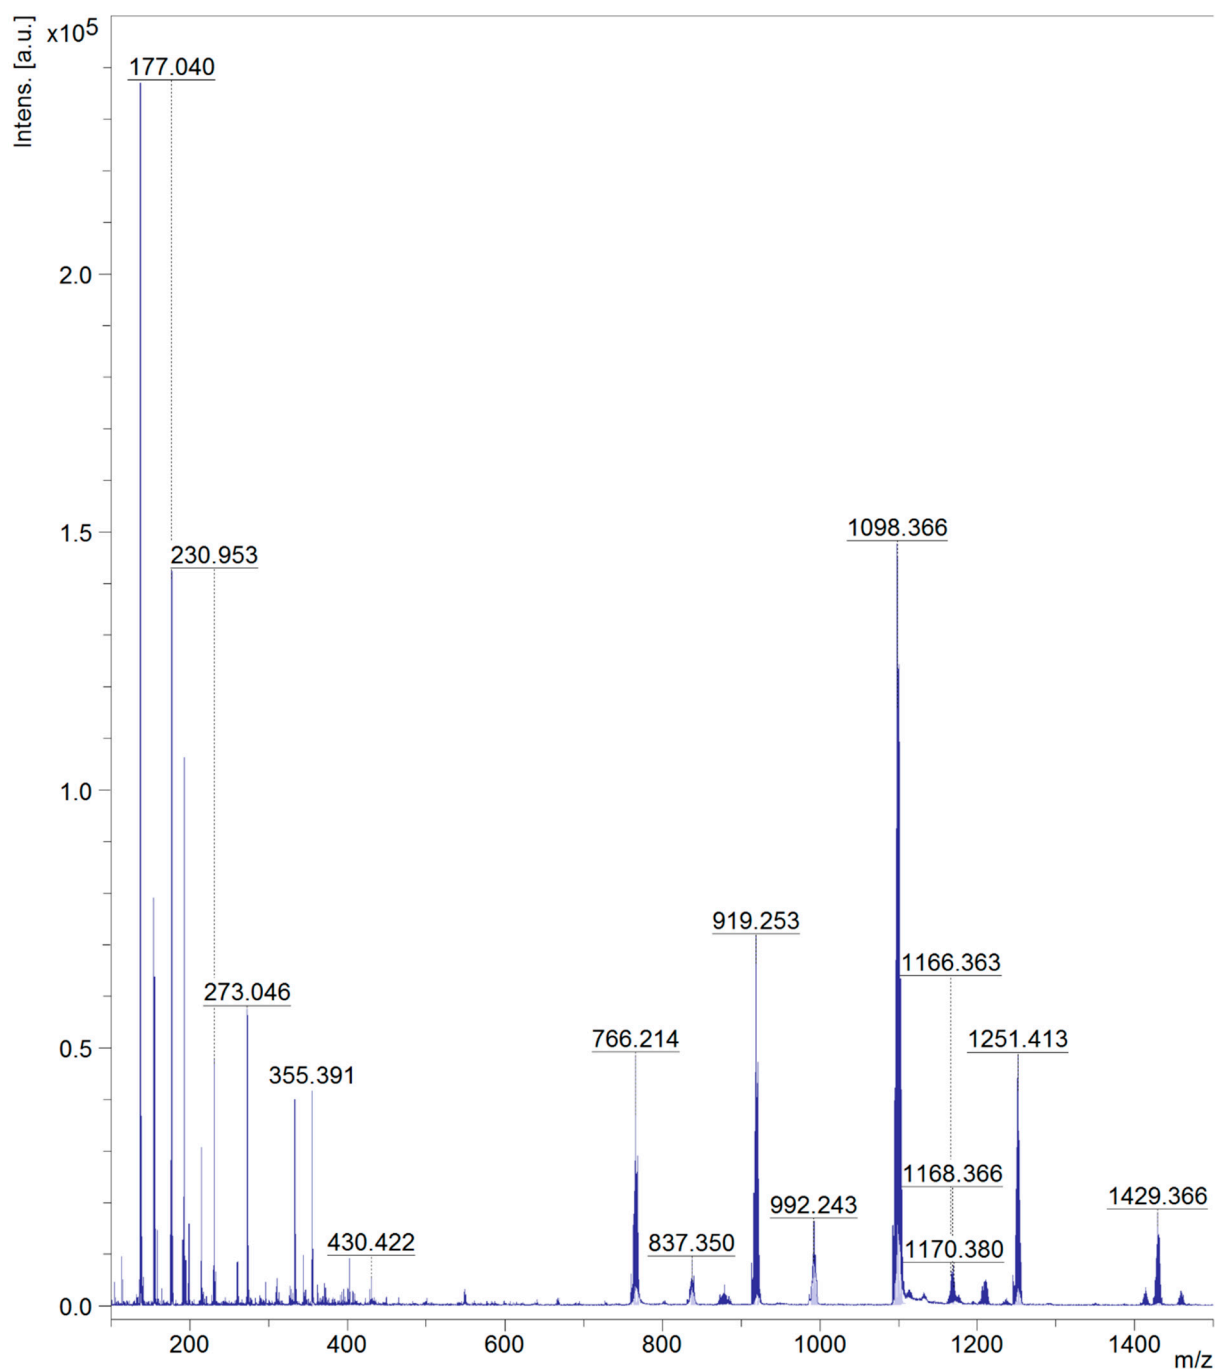

**Figure S13.** MALDI-TOF mass spectrum (DHB matrix) obtained for Box probe; m/z signals found (calc.): [M+H]<sup>+</sup> 1170.38 (1170.24); [M-2Cl]<sup>+</sup> 1098.37 (1098.24).

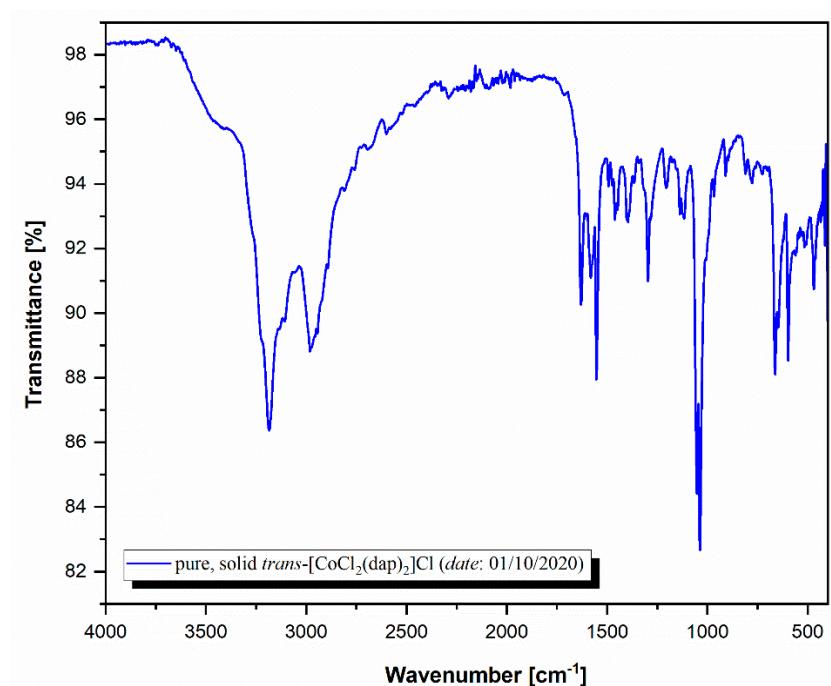

**Figure S14.** ATR spectrum of cobalt(III) complex synthesized with 1,3-diamine propane. The compound (**1**) solid sample was used to register the oscillatory vibration bands.

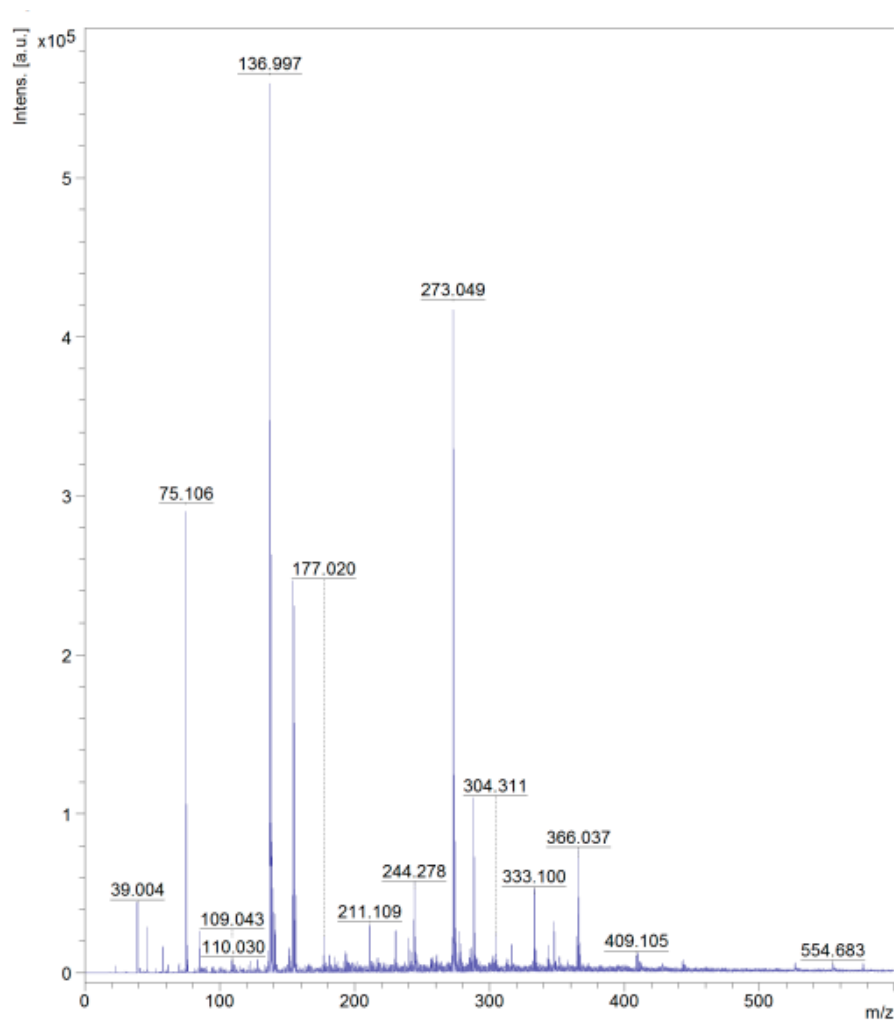

**Figure S15.** MALDI-TOF mass spectrum (DHB matrix) obtained for (**1**) Co(III) complex.

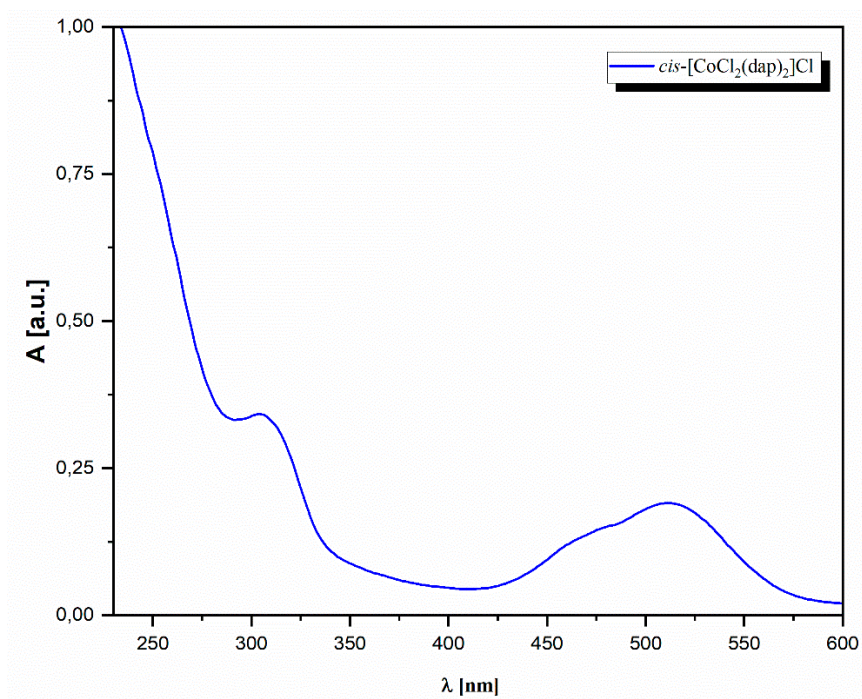

**Figure S16.** The absorption spectrum of an aqueous solution of coordination compound (1).

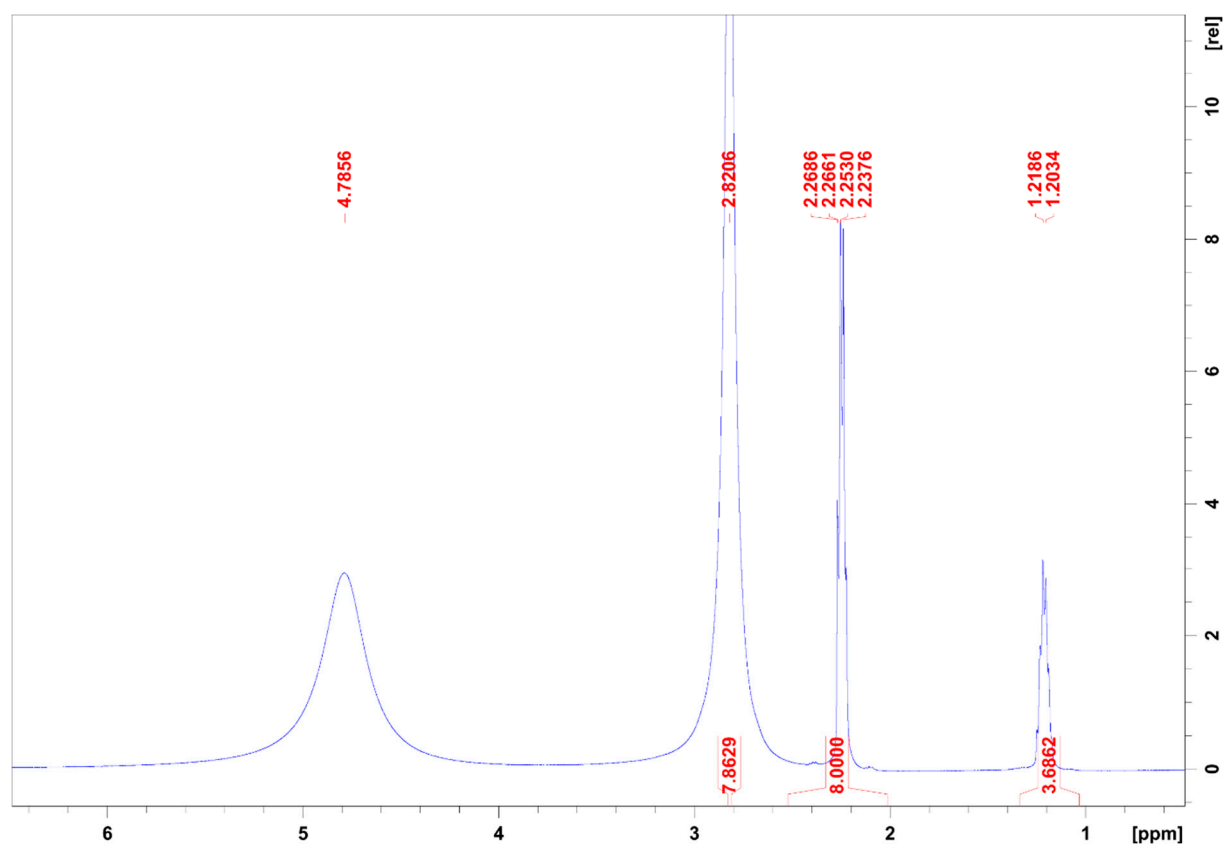

**Figure S17.**  $^1\text{H}$  NMR spectrum of compound (1) with proton integration registered in  $\text{D}_2\text{O}$  at 298 K.



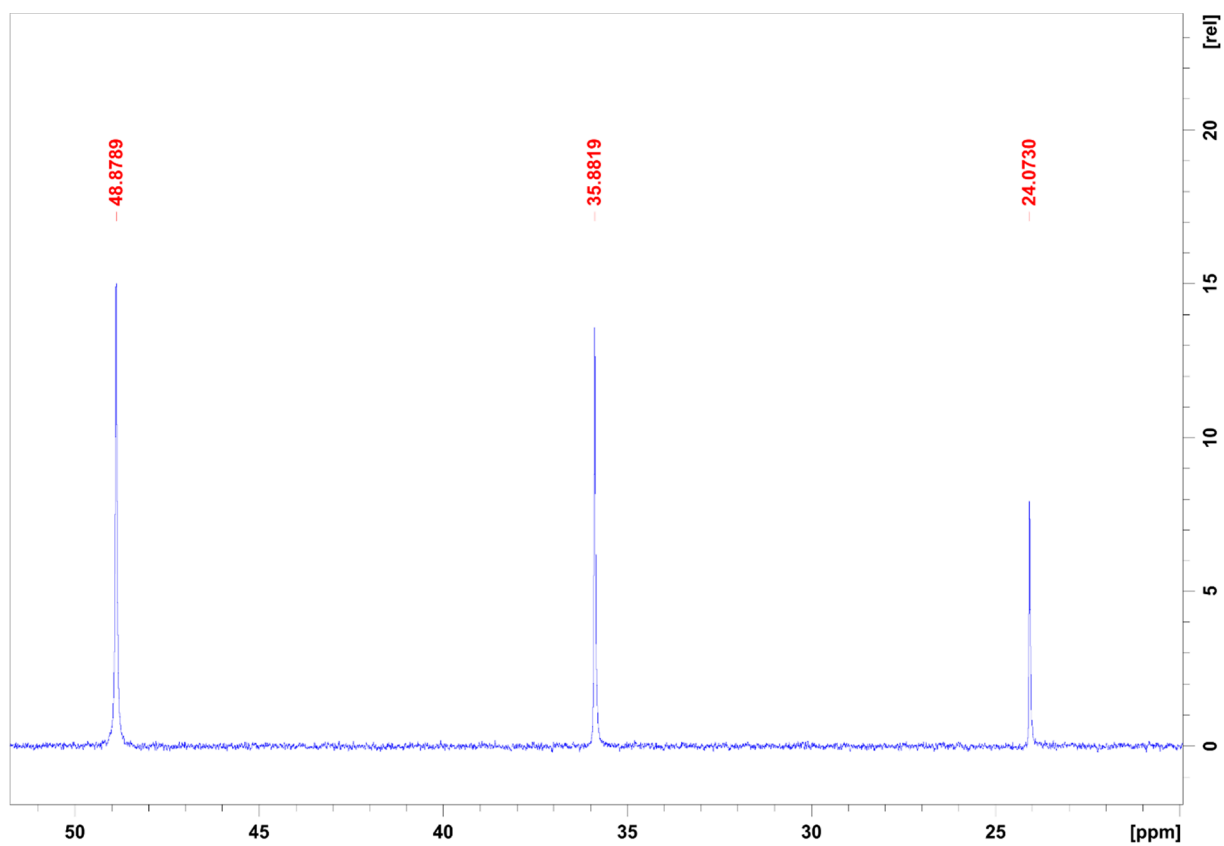

**Figure S18.** <sup>13</sup>C NMR spectrum of compound (1) together with C-signals registered in D<sub>2</sub>O at 298K.

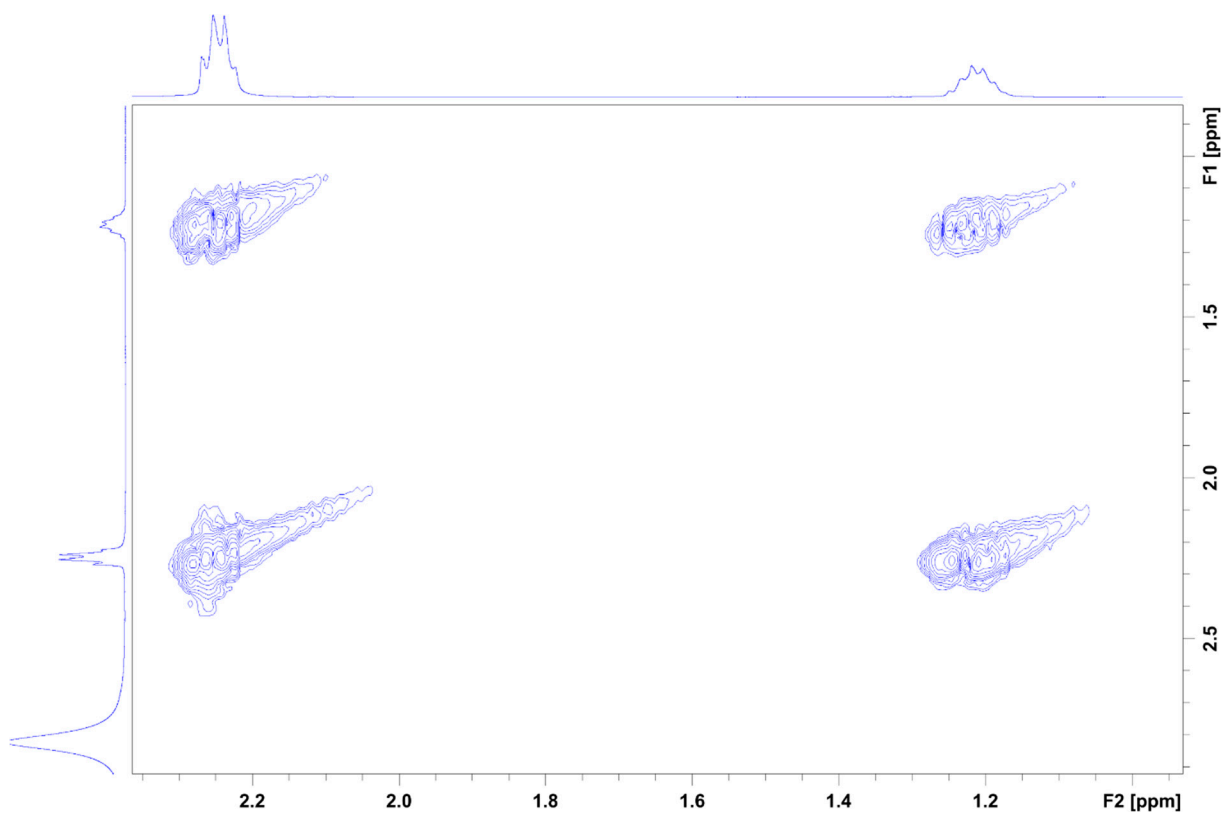

**Figure S19.** The 2D COSY spectrum of compound (1) registered in D<sub>2</sub>O at 298K.

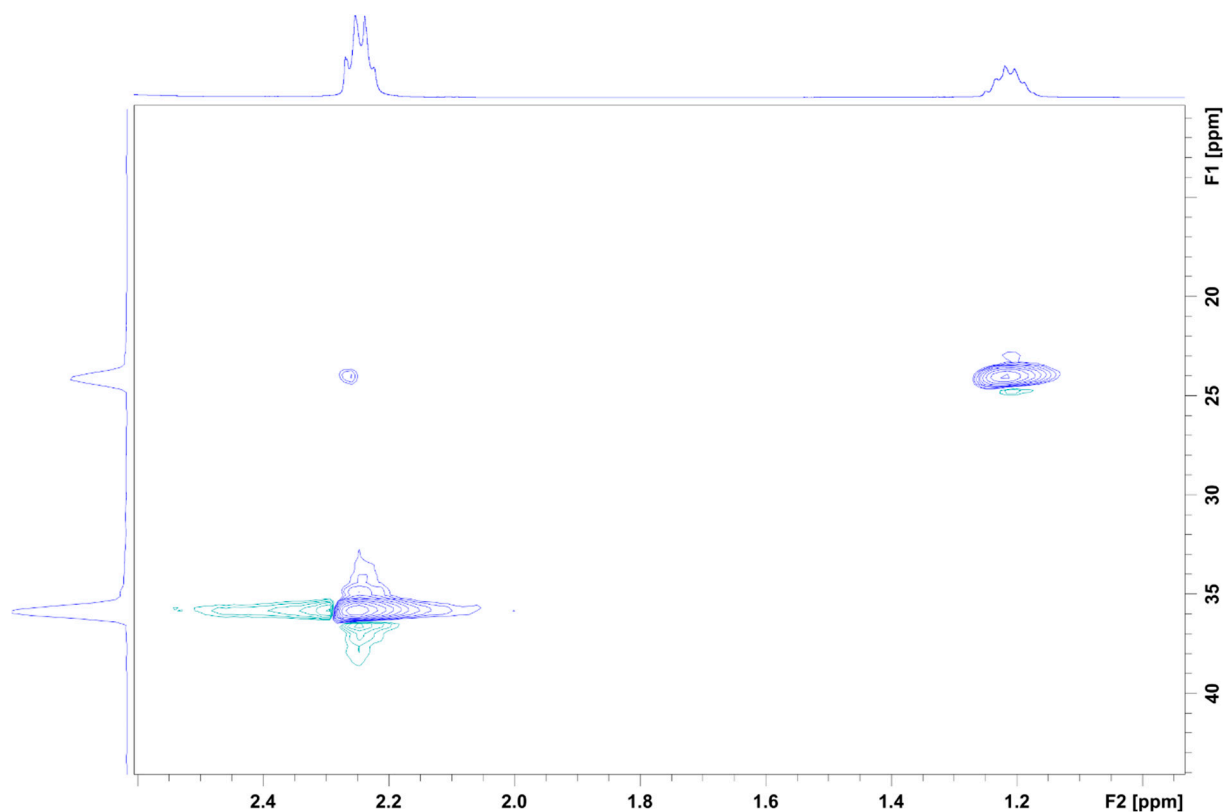

**Figure S20.** The main fragment of the HSQC spectrum of compound **(1)** indicated the C and H coupling only registered in D<sub>2</sub>O at 298K.

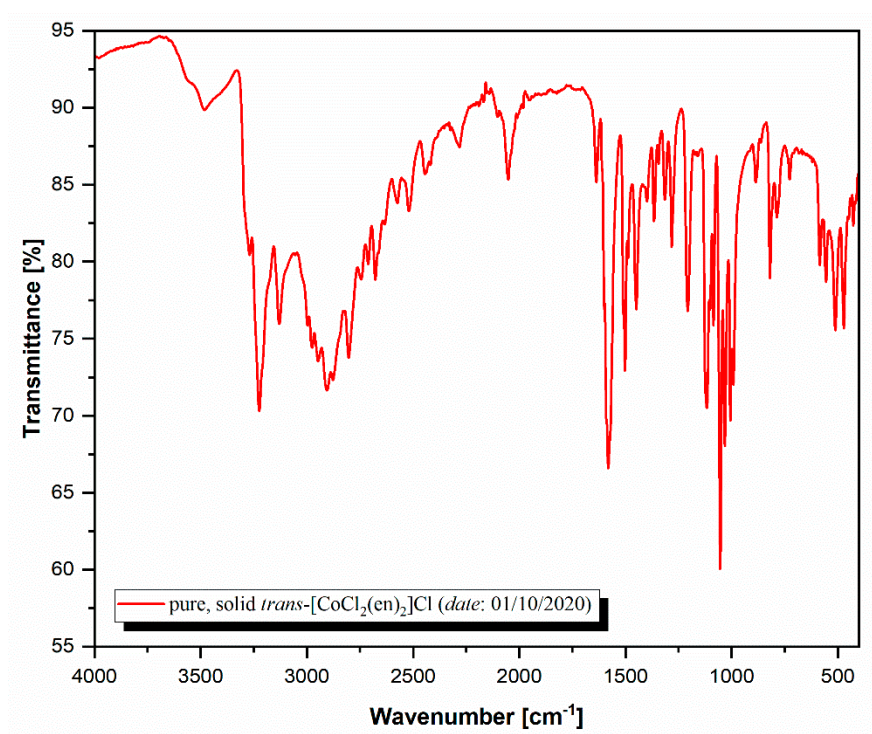

**Figure S21.** ATR spectrum of cobalt(III) complex synthesized with ethylenediamine. The compound **(2)** solid sample was used to register the oscillatory vibration bands.

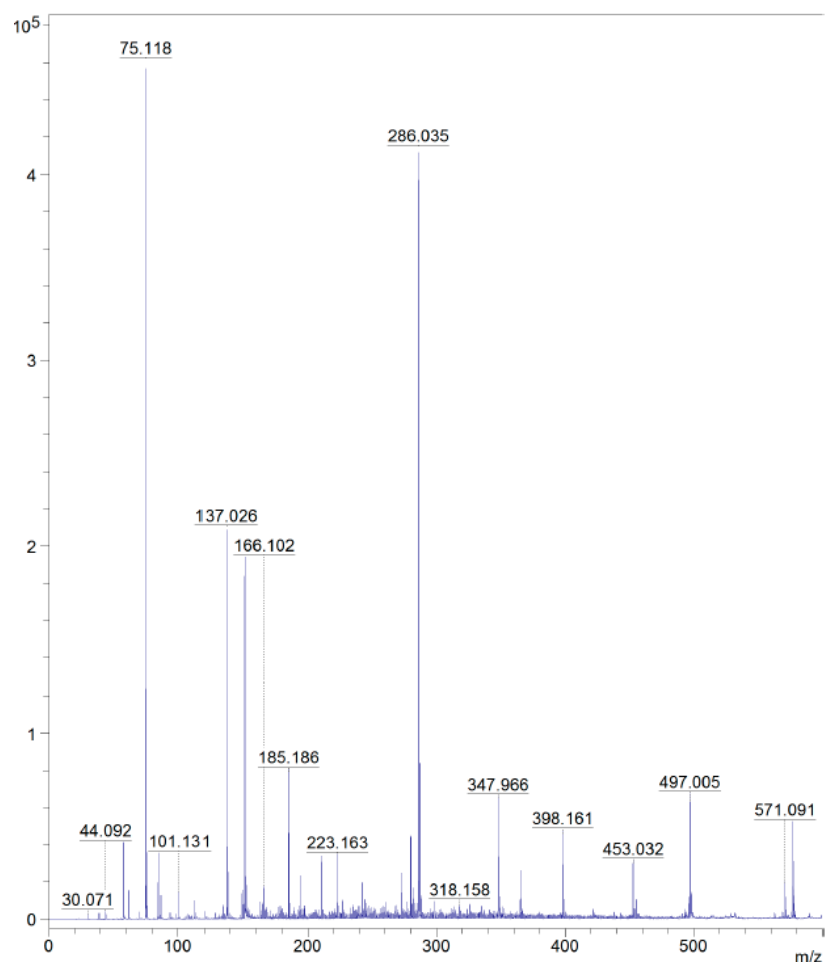

**Figure S22.** MALDI-TOF mass spectrum (DHB matrix) obtained for Co(III) complex (**2**).

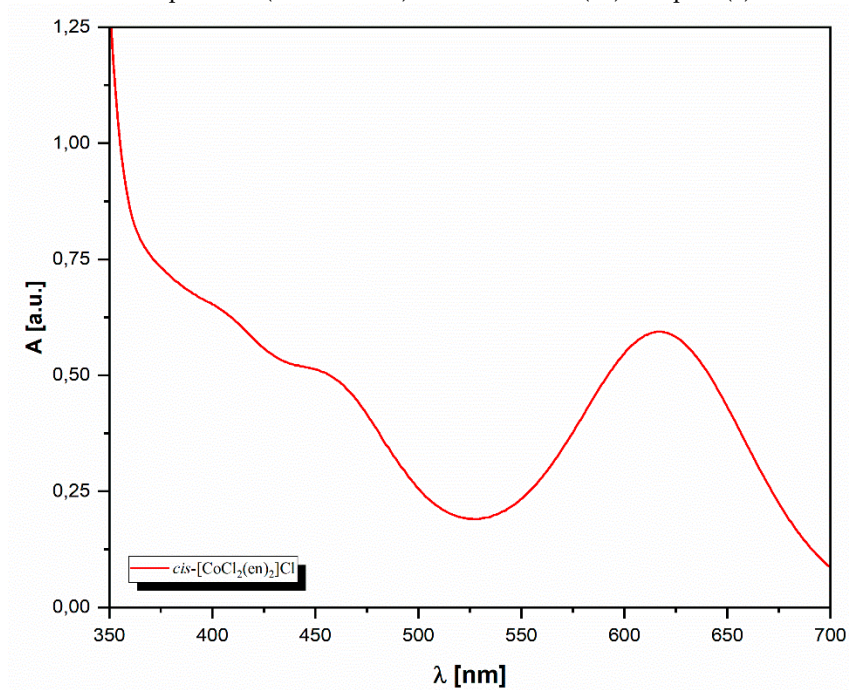

**Figure S23.** The absorption spectrum of an aqueous solution of coordination compound (**2**).

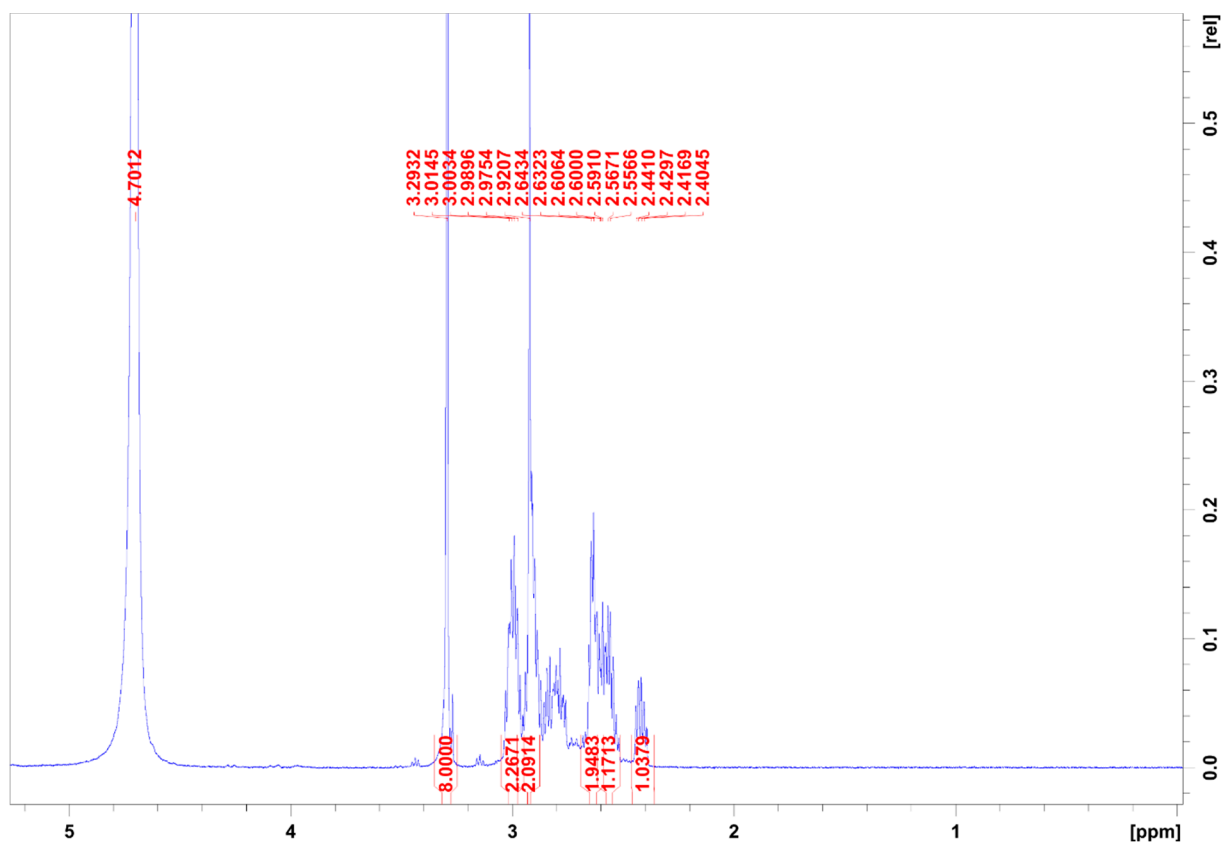

**Figure S24.**  $^1\text{H}$  NMR spectrum of compound (2) with proton integration registered in  $\text{D}_2\text{O}$  at 298K.

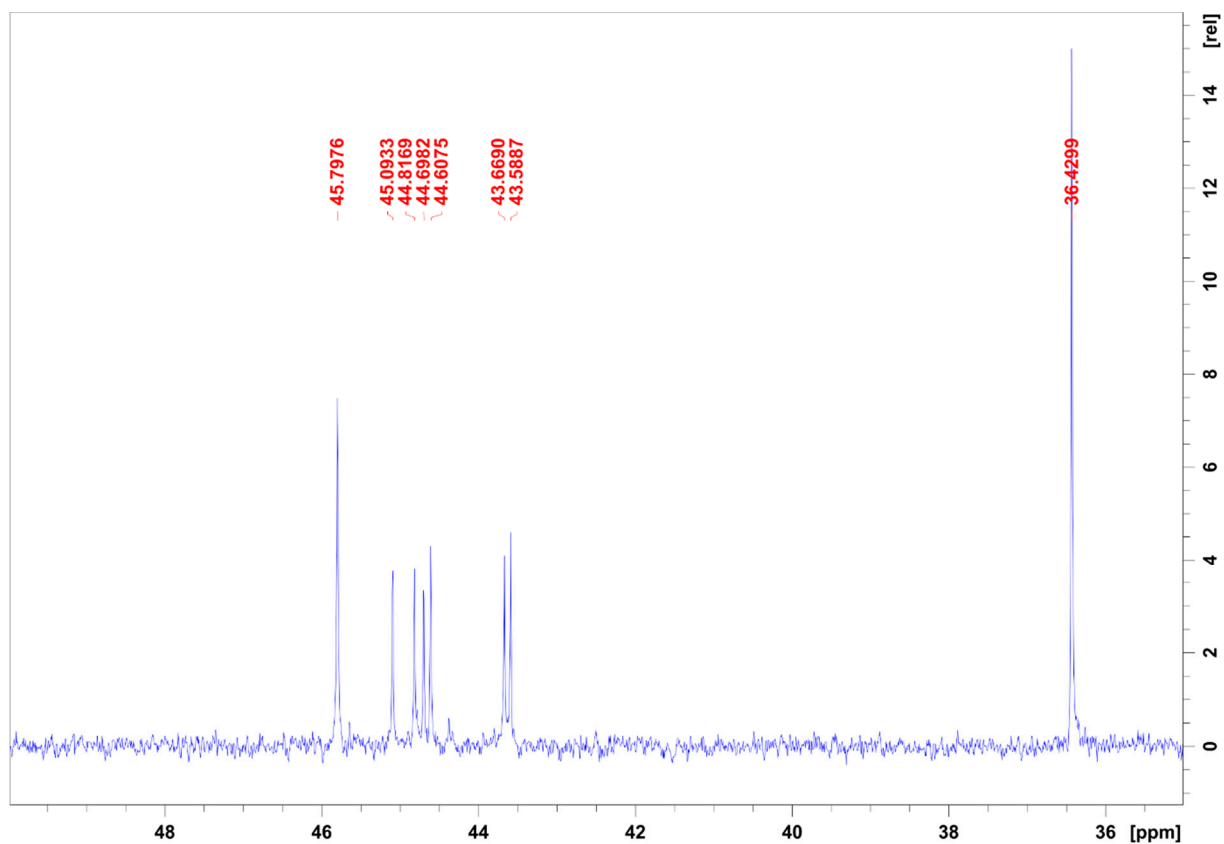

**Figure S25.**  $^{13}\text{C}$  NMR spectrum of compound (2) together with C-signals registered in  $\text{D}_2\text{O}$  at 298K. The presence of two geometric isomers of (2) was identified in the solution (*cis* and *trans* form).



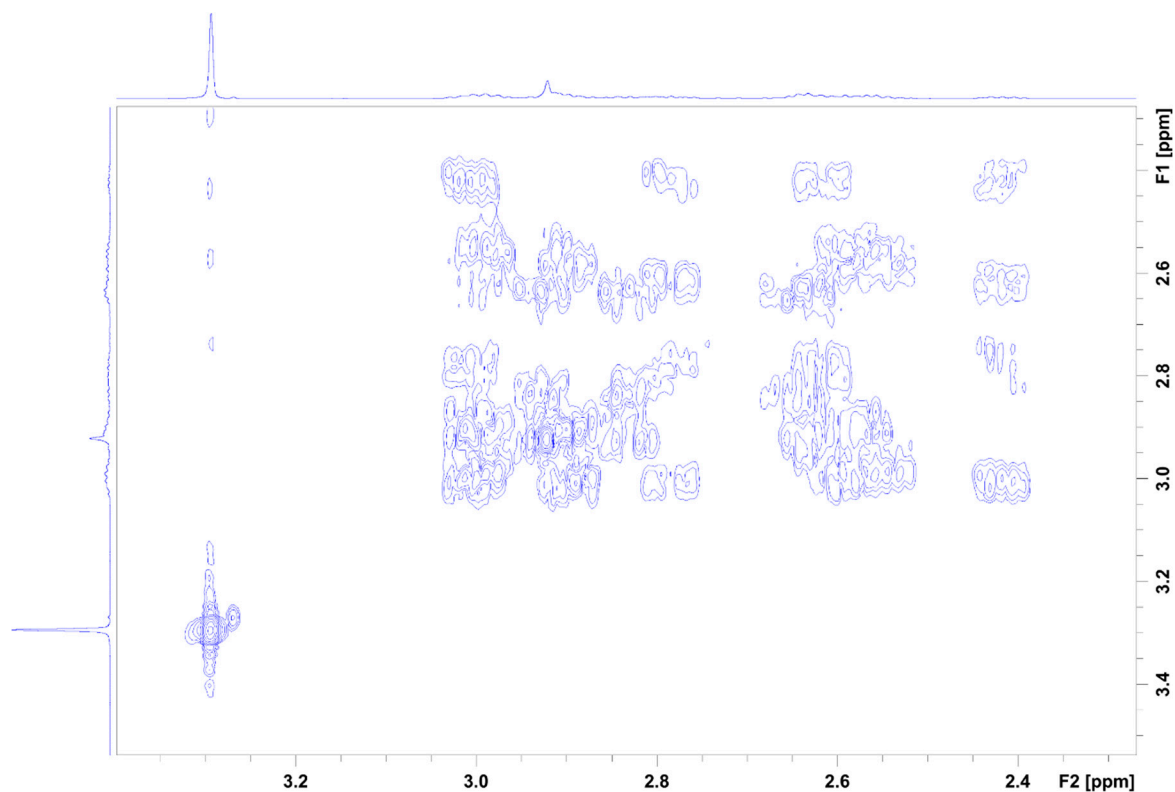

**Figure S26.** The 2D COSY spectrum of (2) is registered in D<sub>2</sub>O at 298K. Note that the NMR identified the *cis* and *trans* forms of compound (2) in the D<sub>2</sub>O.

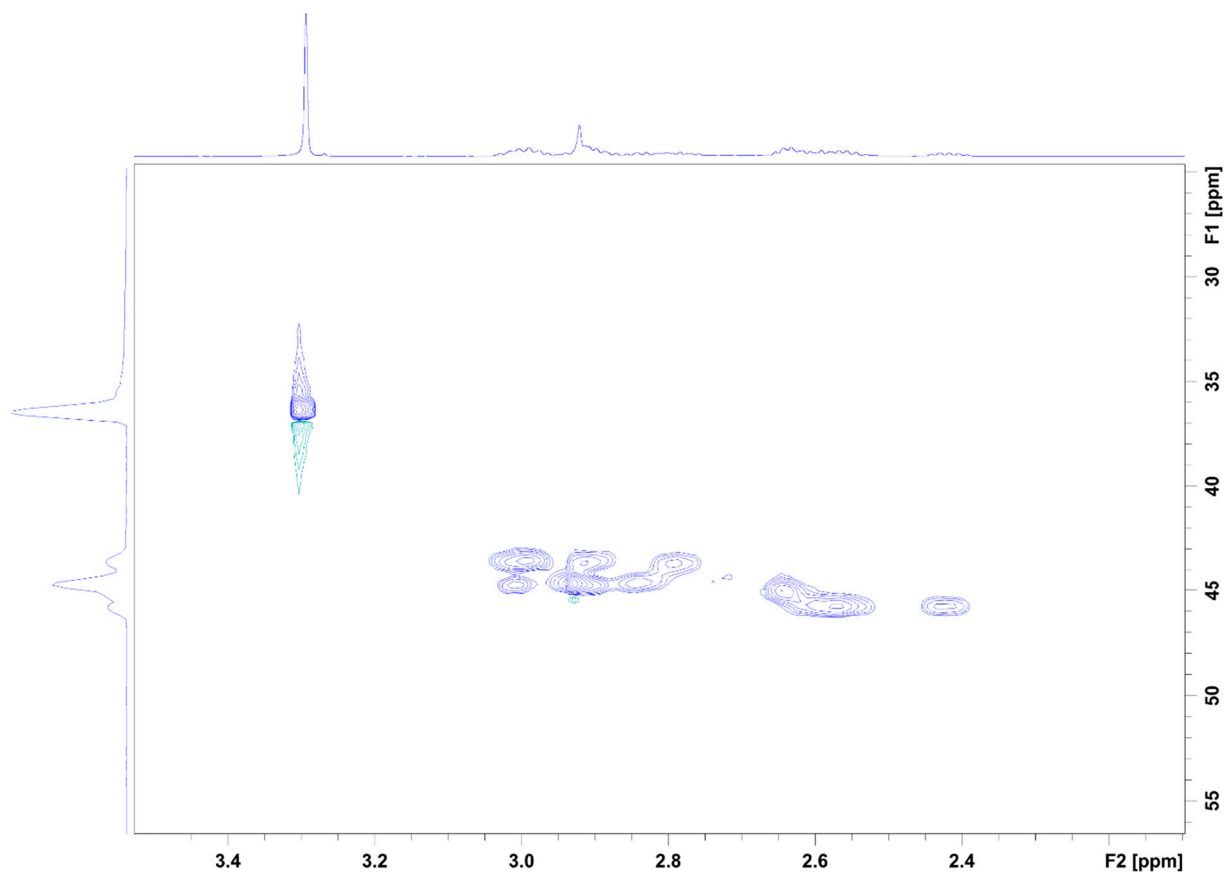

**Figure S27.** The main fragment of the HSQC spectrum of compound (2) indicated the C and H coupling only registered in D<sub>2</sub>O at 298K. The presence of two isomers of (2) was identified in the solution.

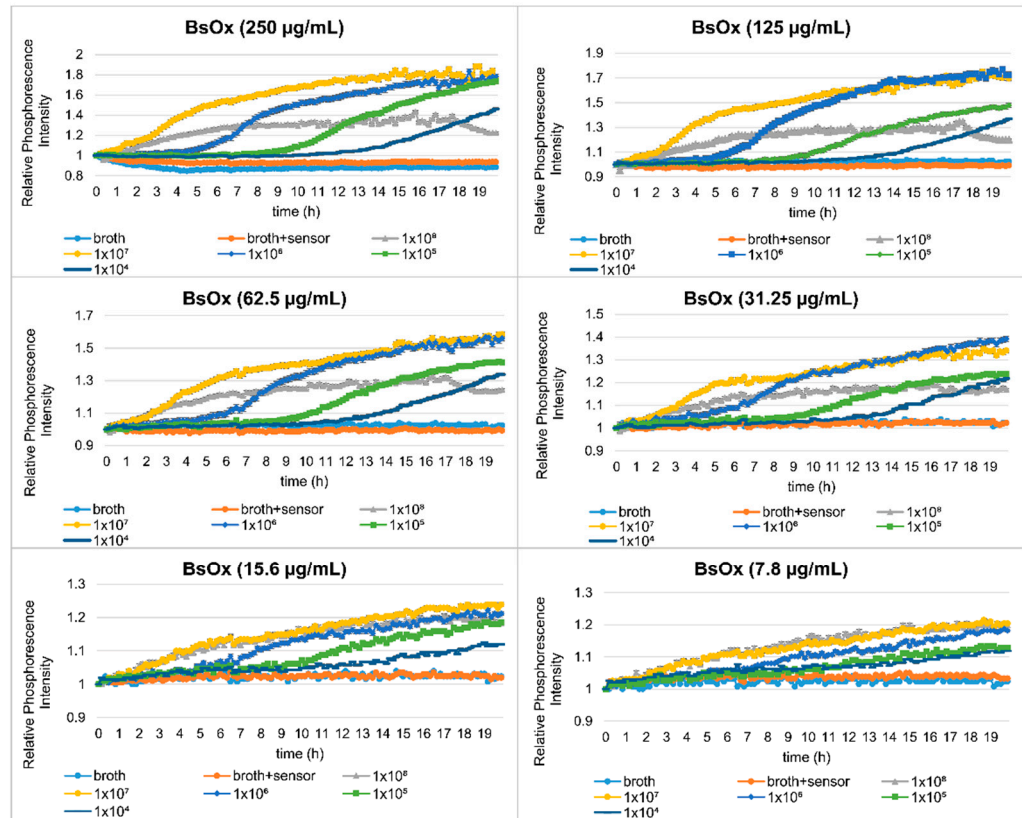

(a) *C. albicans* ATCC 10231

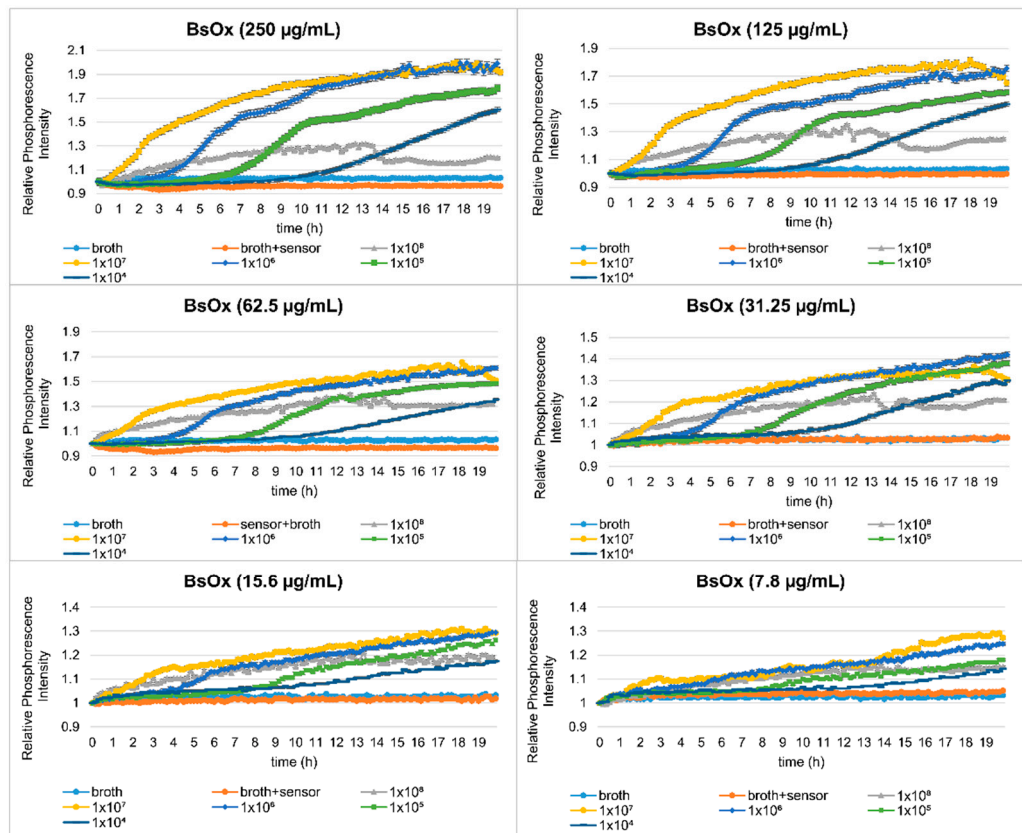

(b) *C. albicans* 12823

**Figure S28.** Profiles of relative phosphorescence intensities of (a) *C. albicans* ATCC 10231 and (b) *C. albicans* 12823 strains, against time for different concentrations of Box sensor (250 – 7.8 µg/mL). The optical density of the tested yeast was 10<sup>7</sup> CFU/mL.

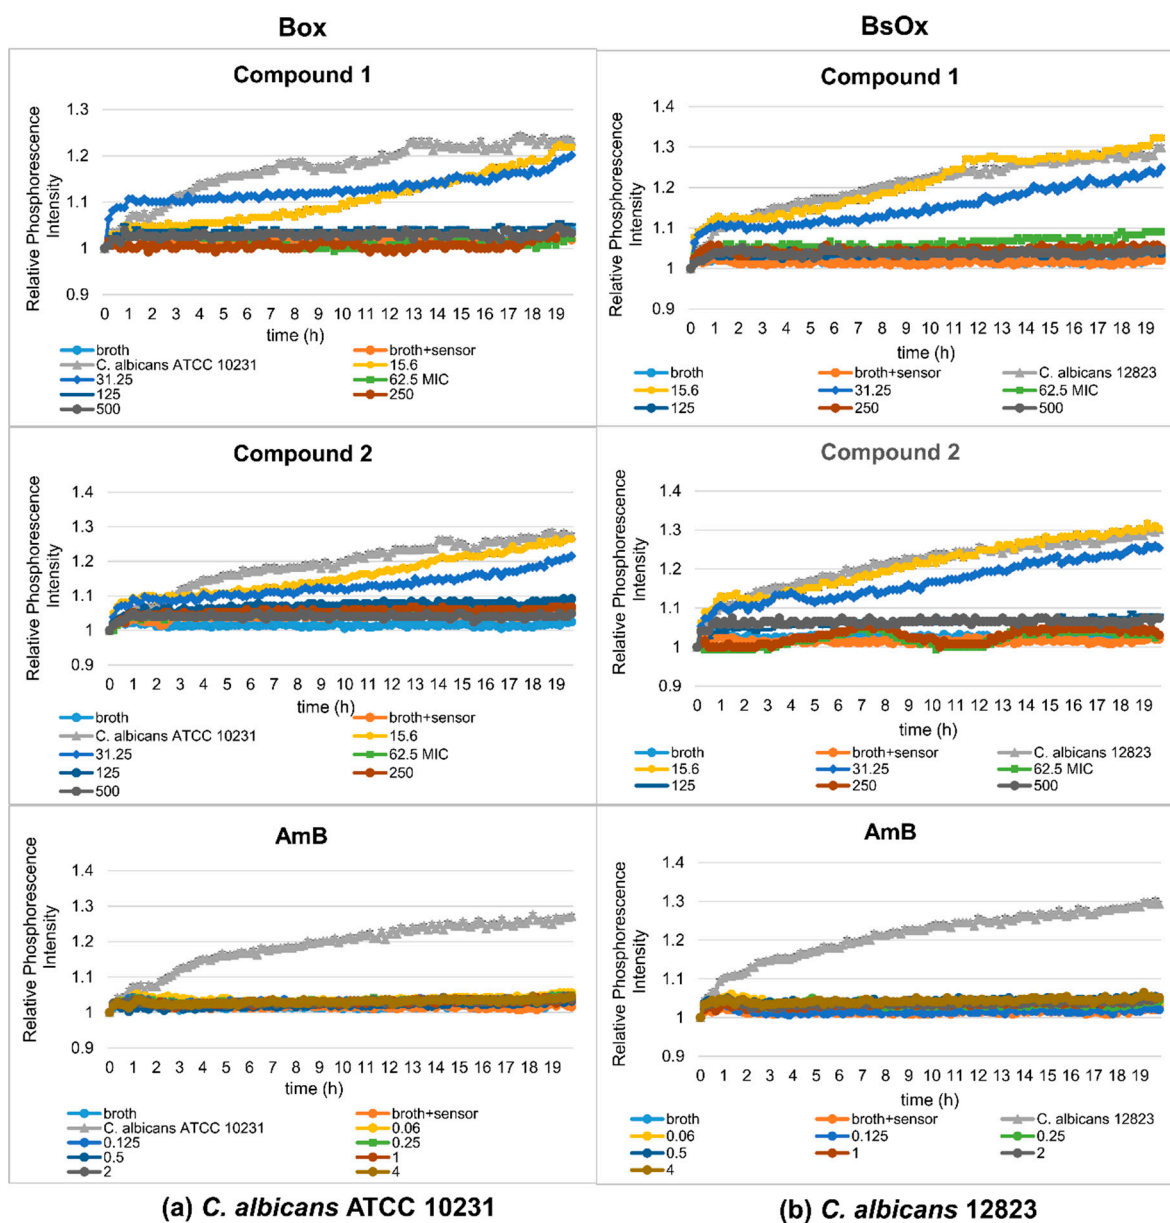

**Figure S29.** Profiles of relative phosphorescence intensity of (a) *C. albicans* ATCC 10231 and (b) *C. albicans* 12823 strains against different concentrations of compound (1), compound (2), and AmB with Box and BsOx (31.25 µg/mL) sensors. In the legend, the sample concentration is expressed in µg/mL.

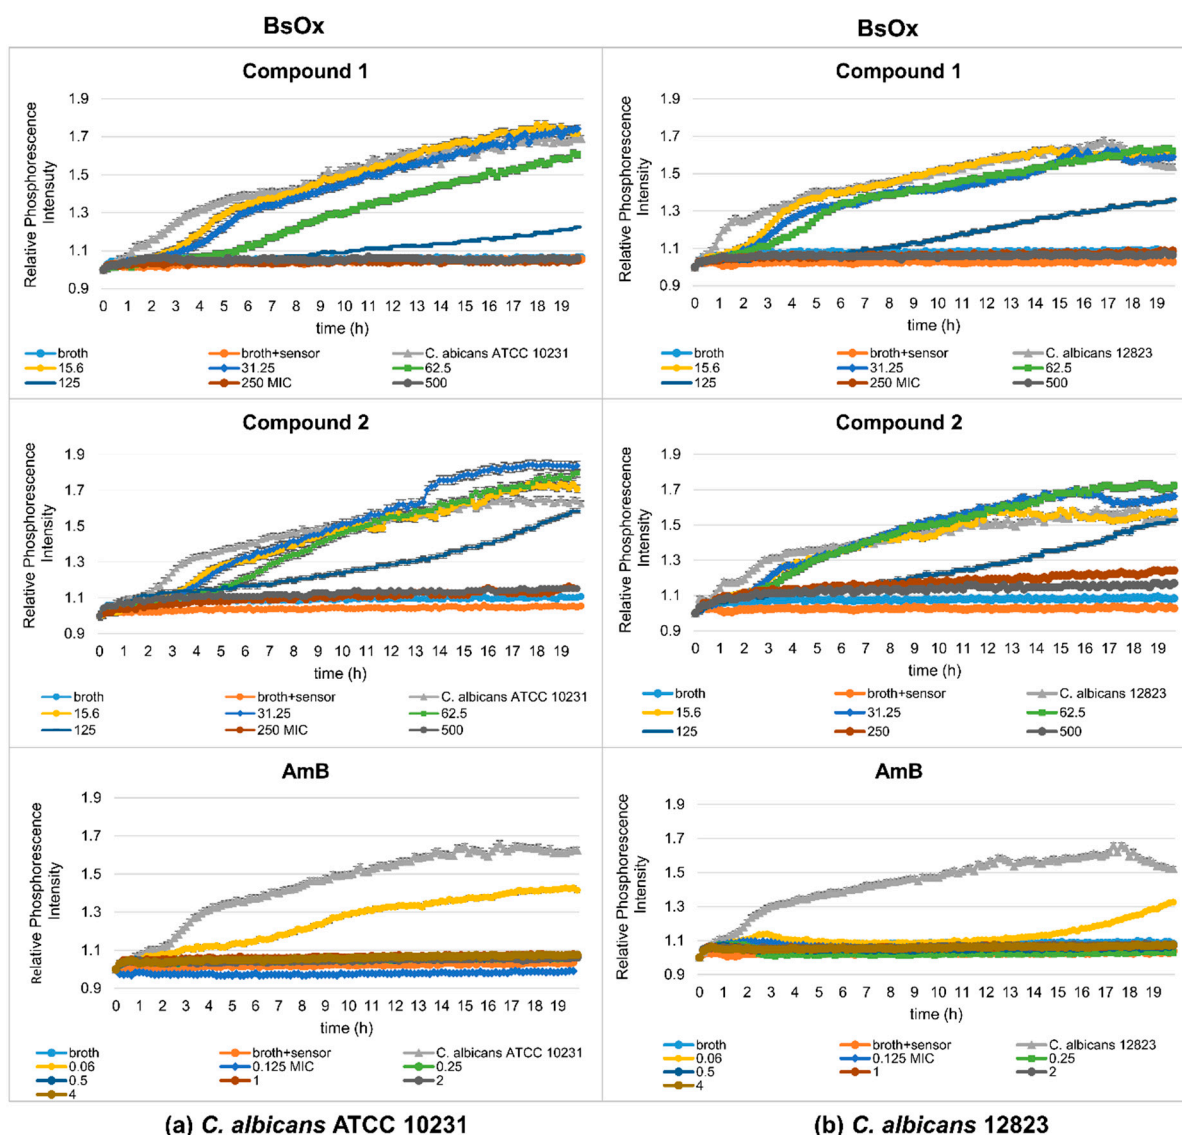

**Figure S30.** Profiles of relative phosphorescence intensities of (a) *C. albicans* ATCC 10231 and (b) *C. albicans* 12823 strains against different concentrations of compound (1), compound (2), and AmB with Box and BsOx (62.5 µg/mL) sensors. In the legend, the sample concentration is expressed in µg/mL.



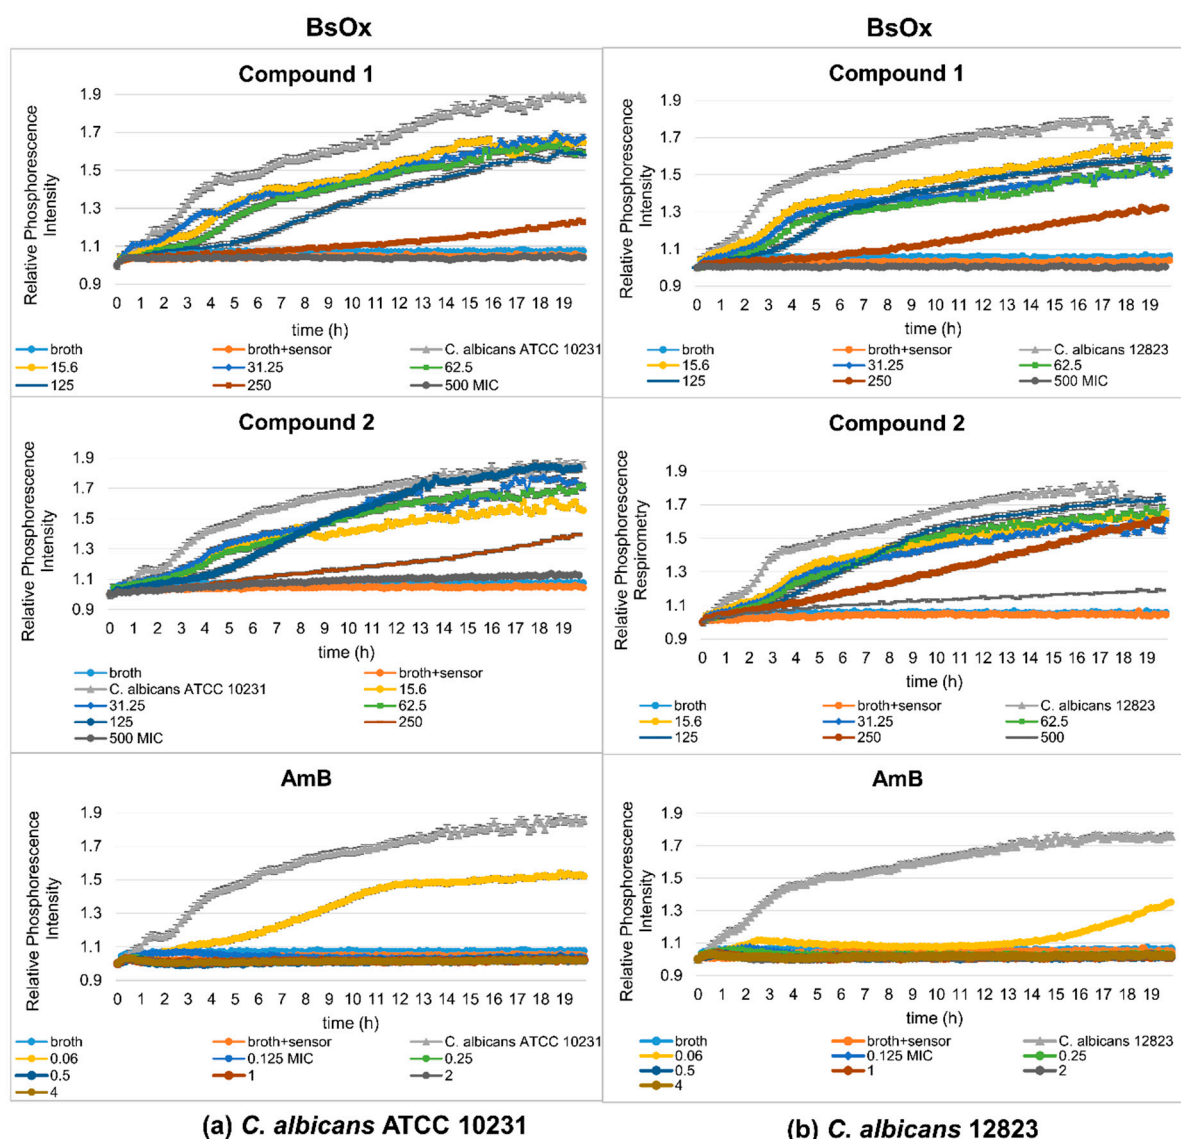

**Figure S31.** Profiles of relative phosphorescence intensities of (a) *C. albicans* ATCC 10231 and (b) *C. albicans* 12823 strains against the different concentrations of compound (1), compound (2), and AmB with Box and BsOx (125 µg/mL) sensors. In the legend, the sample concentration is expressed in µg/mL.
